# Supplementary material for: Low-grade inflammation is associated with a heterogeneous lipoprotein subclass profile in an apparently healthy population sample
Source: PubMed Central journal article supplement (PMC10334607; doi:10.1186/s12944-023-01856-6), 2023-07-11
Supplement: 12944_2023_1856_MOESM1_ESM.pdf [file 12944_2023_1856_MOESM1_ESM.pdf]

## Supplement

*“Low-grade inflammation is associated with a heterogeneous lipoprotein subclass profile in apparently healthy population sample”*

**Table S1.** Concentration of inflammatory markers in the study population.

|                     | <i>Coefficient of variation [%]</i> | <b>Concentration of inflammatory markers [pg/ml]</b> |           |           |             |           |
|---------------------|-------------------------------------|------------------------------------------------------|-----------|-----------|-------------|-----------|
|                     |                                     | <b>Median</b>                                        | <b>Q1</b> | <b>Q3</b> | <b>Mean</b> | <b>SD</b> |
| Chitinase 3-like 1  | 11.2                                | 8792                                                 | 7208      | 10459     | 8971        | 2623      |
| IFN-alpha2          | 10.2                                | 44.7                                                 | 38.5      | 55.3      | 49.2        | 16.1      |
| IFN-beta            | 6.2                                 | 21.2                                                 | 15.9      | 26.2      | 22.9        | 13.7      |
| IFN-gamma           | 9.6                                 | 10.2                                                 | 8.5       | 13.6      | 12.0        | 5.4       |
| IL-10               | 5.9                                 | 24.2                                                 | 22.2      | 26.4      | 24.2        | 3.8       |
| IL-11               | 15.8                                | 1.16                                                 | 0.78      | 1.86      | 1.43        | 0.96      |
| IL-12 (p40)         | 5.5                                 | 63.1                                                 | 48.4      | 90.1      | 75.0        | 37.3      |
| IL-19               | 7.3                                 | 35.3                                                 | 31.7      | 40.9      | 37.6        | 9.4       |
| IL-22               | 8.9                                 | 19.7                                                 | 17.6      | 22.5      | 23.3        | 30.9      |
| IL-26               | 9.7                                 | 101.7                                                | 96.0      | 107.8     | 101.3       | 15.4      |
| IL-29 / IFN-lambda1 | 9                                   | 76.3                                                 | 60.4      | 101.9     | 85.7        | 43.2      |
| IL-32               | 7.3                                 | 32.1                                                 | 21.6      | 54.1      | 43.4        | 35.5      |
| IL-34               | 7.4                                 | 170.1                                                | 120.2     | 232.6     | 192.1       | 106.1     |
| IL-35               | 3.4                                 | 124.8                                                | 101.7     | 163.7     | 140.9       | 56.4      |
| IL-8                | 7.7                                 | 200.1                                                | 169.5     | 240.4     | 218.4       | 86.8      |
| MMP-1               | 10.3                                | 891.3                                                | 699.2     | 1094.7    | 931.1       | 374.9     |
| MMP-2               | 7.7                                 | 4399                                                 | 3575      | 5291      | 4758        | 1897      |
| MMP-3               | 6.6                                 | 5812                                                 | 4025      | 7940      | 6268        | 2909      |
| Osteocalcin         | 5                                   | 2024                                                 | 1679      | 2521      | 2146        | 750       |
| Osteopontin (OPN)   | 11.5                                | 30248                                                | 24857     | 37022     | 34733       | 20744     |
| Pentraxin-3         | 10.3                                | 360.9                                                | 251.2     | 486.1     | 416.7       | 267.0     |
| TWEAK / TNFSF12     | 20.9                                | 210.0                                                | 179.9     | 246.3     | 214.2       | 53.0      |
| APRIL / TNFSF13     | 20.2                                | 106158                                               | 89479     | 127615    | 110169      | 32524     |
| BAFF / TNFSF13B     | 3.7                                 | 5586                                                 | 4819      | 6786      | 5963        | 1947      |
| LIGHT / TNFSF14     | 9.1                                 | 75.7                                                 | 52.6      | 107.7     | 90.9        | 72.3      |
| TSLP                | 9.8                                 | 62.0                                                 | 52.7      | 82.1      | 71.7        | 32.4      |
| gp130 / sIL-6Rbeta  | 4.7                                 | 15953                                                | 12693     | 19201     | 16972       | 7887      |
| sCD163              | 9.7                                 | 49902                                                | 37794     | 64626     | 55050       | 27411     |
| sCD30 / TNFRSF8     | 4.9                                 | 213.2                                                | 162.0     | 273.6     | 231.9       | 109.0     |
| sTNF-R1             | 4.1                                 | 904.6                                                | 701.4     | 1116.7    | 943.1       | 373.6     |
| sTNF-R2             | 4.1                                 | 1967                                                 | 1447      | 2494      | 2127        | 974       |

SD =standard deviation.

**Table S2.** Associations of lipoprotein subclasses with inflammatory parameters assessed by linear regression analyses. All analyses were adjusted for age, sex, smoking behavior and lean body mass. Orange and blue shading indicate positive and inverse associations.

inverse association with \*FDR < 0.05  
positive association with \*FDR < 0.05

|                      | Beta estimates (stdev) for standardized outcome and exposure |         |         |         |         |         |         |         |        |         |         |         |         |         |         |         |         |         |         |         |         |         |         |         |         |         |         |         |         |         |        |
|----------------------|--------------------------------------------------------------|---------|---------|---------|---------|---------|---------|---------|--------|---------|---------|---------|---------|---------|---------|---------|---------|---------|---------|---------|---------|---------|---------|---------|---------|---------|---------|---------|---------|---------|--------|
|                      | LDL-C                                                        | VLDL-C  | IDL-C   | LDL-P   | LDL-C/  | LDL-C/  | LDL-C/  | LDL-C/  | LDL-C/ | LDL-C/  | LDL-C/  | LDL-C/  | LDL-C/  | LDL-C/  | LDL-C/  | LDL-C/  | LDL-C/  | LDL-C/  | LDL-C/  | LDL-C/  | LDL-C/  | LDL-C/  | LDL-C/  | LDL-C/  | LDL-C/  | LDL-C/  | LDL-C/  | LDL-C/  | LDL-C/  |         |        |
|                      | LDL-C                                                        | VLDL-C  | IDL-C   | LDL-P   | LDL-C/  | LDL-C/  | LDL-C/  | LDL-C/  | LDL-C/ | LDL-C/  | LDL-C/  | LDL-C/  | LDL-C/  | LDL-C/  | LDL-C/  | LDL-C/  | LDL-C/  | LDL-C/  | LDL-C/  | LDL-C/  | LDL-C/  | LDL-C/  | LDL-C/  | LDL-C/  | LDL-C/  | LDL-C/  | LDL-C/  | LDL-C/  | LDL-C/  | LDL-C/  |        |
| Total Cholesterol    | 0.0270                                                       | 0.1184  | 0.1877  | 0.2810  | 0.2072  | 0.1870  | 0.1853  | 0.2183  | 0.1784 | 0.1235  | 0.2183  | 0.1784  | 0.1235  | 0.2183  | 0.1784  | 0.1235  | 0.2183  | 0.1784  | 0.1235  | 0.2183  | 0.1784  | 0.1235  | 0.2183  | 0.1784  | 0.1235  | 0.2183  | 0.1784  | 0.1235  | 0.2183  | 0.1784  | 0.1235 |
| VLDL Cholesterol     | 0.1178                                                       | 0.1230  | 0.1167  | 0.0432  | 0.1156  | 0.1009  | 0.1034  | 0.0463  | 0.0782 | 0.0215  | 0.0543  | 0.0758  | 0.0215  | 0.0543  | 0.0758  | 0.0215  | 0.0543  | 0.0758  | 0.0215  | 0.0543  | 0.0758  | 0.0215  | 0.0543  | 0.0758  | 0.0215  | 0.0543  | 0.0758  | 0.0215  | 0.0543  | 0.0758  |        |
| LDL-1 Cholesterol    | 0.1102                                                       | 0.1067  | 0.1036  | 0.0823  | 0.1054  | 0.0954  | 0.0810  | 0.0534  | 0.0647 | 0.0327  | 0.0753  | 0.0840  | 0.0327  | 0.0753  | 0.0840  | 0.0327  | 0.0753  | 0.0840  | 0.0327  | 0.0753  | 0.0840  | 0.0327  | 0.0753  | 0.0840  | 0.0327  | 0.0753  | 0.0840  | 0.0327  | 0.0753  | 0.0840  |        |
| LDL-2 Cholesterol    | 0.1268                                                       | 0.1149  | 0.1129  | 0.0925  | 0.1125  | 0.1079  | 0.1038  | 0.0801  | 0.0718 | 0.0567  | 0.1107  | 0.0715  | 0.0567  | 0.1107  | 0.0715  | 0.0567  | 0.1107  | 0.0715  | 0.0567  | 0.1107  | 0.0715  | 0.0567  | 0.1107  | 0.0715  | 0.0567  | 0.1107  | 0.0715  | 0.0567  | 0.1107  | 0.0715  |        |
| LDL-3 Cholesterol    | 0.1184                                                       | 0.1184  | 0.1184  | 0.0950  | 0.1184  | 0.1073  | 0.1073  | 0.0952  | 0.0760 | 0.0202  | 0.0428  | 0.1016  | 0.0202  | 0.0428  | 0.1016  | 0.0202  | 0.0428  | 0.1016  | 0.0202  | 0.0428  | 0.1016  | 0.0202  | 0.0428  | 0.1016  | 0.0202  | 0.0428  | 0.1016  | 0.0202  | 0.0428  | 0.1016  |        |
| LDL-4 Cholesterol    | 0.1275                                                       | 0.1144  | 0.1143  | 0.0978  | 0.1268  | 0.0976  | 0.1234  | 0.0912  | 0.0879 | -0.0067 | 0.0389  | 0.0628  | -0.0067 | 0.0389  | 0.0628  | -0.0067 | 0.0389  | 0.0628  | -0.0067 | 0.0389  | 0.0628  | -0.0067 | 0.0389  | 0.0628  | -0.0067 | 0.0389  | 0.0628  | -0.0067 | 0.0389  | 0.0628  |        |
| LDL-5 Cholesterol    | 0.0880                                                       | 0.0388  | 0.0420  | 0.0652  | 0.0379  | 0.0491  | 0.0234  | 0.0422  | 0.0315 | -0.0470 | 0.0207  | -0.0427 | -0.0470 | 0.0207  | -0.0427 | -0.0470 | 0.0207  | -0.0427 | -0.0470 | 0.0207  | -0.0427 | -0.0470 | 0.0207  | -0.0427 | -0.0470 | 0.0207  | -0.0427 | -0.0470 | 0.0207  | -0.0427 |        |
| IDL Cholesterol      | 0.1875                                                       | 0.0531  | 0.1790  | 0.1283  | 0.0528  | 0.1368  | 0.1378  | 0.1569  | 0.1465 | 0.0732  | 0.0261  | 0.0486  | 0.0732  | 0.0261  | 0.0486  | 0.0732  | 0.0261  | 0.0486  | 0.0732  | 0.0261  | 0.0486  | 0.0732  | 0.0261  | 0.0486  | 0.0732  | 0.0261  | 0.0486  | 0.0732  | 0.0261  | 0.0486  |        |
| LDL Cholesterol      | 0.1730                                                       | 0.1784  | 0.1524  | 0.1779  | 0.1925  | 0.1428  | 0.1501  | 0.2058  | 0.1474 | 0.1264  | -0.1221 | 0.0671  | -0.1221 | 0.0671  | -0.1221 | 0.0671  | -0.1221 | 0.0671  | -0.1221 | 0.0671  | -0.1221 | 0.0671  | -0.1221 | 0.0671  | -0.1221 | 0.0671  | -0.1221 | 0.0671  | -0.1221 | 0.0671  |        |
| LDL-1 Triglycerides  | 0.1188                                                       | 0.1366  | 0.1279  | 0.1279  | 0.1482  | 0.1132  | 0.1146  | 0.1326  | 0.0929 | 0.0297  | -0.0247 | -0.0286 | 0.0297  | -0.0247 | -0.0286 | 0.0297  | -0.0247 | -0.0286 | 0.0297  | -0.0247 | -0.0286 | 0.0297  | -0.0247 | -0.0286 | 0.0297  | -0.0247 | -0.0286 | 0.0297  | -0.0247 | -0.0286 |        |
| LDL-2 Triglycerides  | 0.0750                                                       | 0.0743  | 0.0734  | 0.0739  | 0.0739  | 0.0739  | 0.0739  | 0.0739  | 0.0739 | 0.0739  | 0.0739  | 0.0739  | 0.0739  | 0.0739  | 0.0739  | 0.0739  | 0.0739  | 0.0739  | 0.0739  | 0.0739  | 0.0739  | 0.0739  | 0.0739  | 0.0739  | 0.0739  | 0.0739  | 0.0739  | 0.0739  | 0.0739  | 0.0739  |        |
| LDL-3 Triglycerides  | 0.0913                                                       | 0.1021  | 0.0986  | 0.1013  | 0.1135  | 0.0918  | 0.1021  | 0.1135  | 0.0918 | 0.1021  | 0.1135  | 0.0918  | 0.1021  | 0.1135  | 0.0918  | 0.1021  | 0.1135  | 0.0918  | 0.1021  | 0.1135  | 0.0918  | 0.1021  | 0.1135  | 0.0918  | 0.1021  | 0.1135  | 0.0918  | 0.1021  | 0.1135  | 0.0918  |        |
| LDL-4 Triglycerides  | 0.0073                                                       | 0.1735  | 0.1625  | 0.1728  | 0.1886  | 0.1782  | 0.1847  | 0.2267  | 0.1377 | 0.1286  | -0.4030 | -0.0030 | -0.4030 | -0.0030 | -0.4030 | -0.0030 | -0.4030 | -0.0030 | -0.4030 | -0.0030 | -0.4030 | -0.0030 | -0.4030 | -0.0030 | -0.4030 | -0.0030 | -0.4030 | -0.0030 | -0.4030 | -0.0030 |        |
| LDL-5 Triglycerides  | 0.0517                                                       | 0.1187  | 0.1225  | 0.1267  | 0.1493  | 0.0663  | 0.1193  | 0.1652  | 0.0751 | 0.0888  | 0.0209  | -0.0180 | 0.0209  | -0.0180 | 0.0209  | -0.0180 | 0.0209  | -0.0180 | 0.0209  | -0.0180 | 0.0209  | -0.0180 | 0.0209  | -0.0180 | 0.0209  | -0.0180 | 0.0209  | -0.0180 | 0.0209  |         |        |
| LDL-6 Triglycerides  | 0.0346                                                       | 0.0218  | 0.0248  | 0.0262  | 0.0248  | 0.0238  | 0.0247  | 0.0254  | 0.0238 | 0.0247  | 0.0254  | 0.0238  | 0.0247  | 0.0254  | 0.0238  | 0.0247  | 0.0254  | 0.0238  | 0.0247  | 0.0254  | 0.0238  | 0.0247  | 0.0254  | 0.0238  | 0.0247  | 0.0254  | 0.0238  | 0.0247  | 0.0254  | 0.0238  |        |
| HDL Cholesterol      | -0.0741                                                      | 0.0273  | 0.0226  | 0.0250  | 0.0250  | 0.0588  | 0.0391  | 0.0817  | 0.0624 | 0.0130  | -0.1369 | -0.0783 | -0.1369 | -0.0783 | -0.1369 | -0.0783 | -0.1369 | -0.0783 | -0.1369 | -0.0783 | -0.1369 | -0.0783 | -0.1369 | -0.0783 | -0.1369 | -0.0783 | -0.1369 | -0.0783 | -0.1369 | -0.0783 |        |
| HDL-1 Cholesterol    | -0.0831                                                      | 0.0388  | 0.0327  | 0.0389  | 0.0424  | 0.0561  | 0.0634  | 0.0931  | 0.0689 | 0.0036  | -0.0722 | -0.0477 | 0.0036  | -0.0722 | -0.0477 | 0.0036  | -0.0722 | -0.0477 | 0.0036  | -0.0722 | -0.0477 | 0.0036  | -0.0722 | -0.0477 | 0.0036  | -0.0722 | -0.0477 | 0.0036  | -0.0722 | -0.0477 |        |
| HDL-2 Cholesterol    | -0.0586                                                      | 0.0213  | 0.0304  | 0.0338  | 0.0544  | 0.0537  | 0.0556  | 0.0492  | 0.0281 | 0.0546  | -0.1144 | -0.1434 | 0.0546  | -0.1144 | -0.1434 | 0.0546  | -0.1144 | -0.1434 | 0.0546  | -0.1144 | -0.1434 | 0.0546  | -0.1144 | -0.1434 | 0.0546  | -0.1144 | -0.1434 | 0.0546  | -0.1144 | -0.1434 |        |
| HDL-3 Cholesterol    | -0.0276                                                      | 0.0269  | 0.0261  | 0.0261  | 0.0248  | 0.0241  | 0.0241  | 0.0241  | 0.0241 | 0.0241  | 0.0241  | 0.0241  | 0.0241  | 0.0241  | 0.0241  | 0.0241  | 0.0241  | 0.0241  | 0.0241  | 0.0241  | 0.0241  | 0.0241  | 0.0241  | 0.0241  | 0.0241  | 0.0241  | 0.0241  | 0.0241  | 0.0241  | 0.0241  |        |
| HDL-4 Cholesterol    | -0.0888                                                      | 0.0075  | -0.0296 | -0.0384 | -0.1240 | -0.0113 | -0.1208 | 0.0258  | 0.0457 | -0.0513 | 0.0545  | -0.0736 | -0.0513 | 0.0545  | -0.0736 | -0.0513 | 0.0545  | -0.0736 | -0.0513 | 0.0545  | -0.0736 | -0.0513 | 0.0545  | -0.0736 | -0.0513 | 0.0545  | -0.0736 | -0.0513 | 0.0545  | -0.0736 |        |
| Total Triglycerides  | 0.1624                                                       | 0.1202  | 0.1180  | 0.1160  | 0.0969  | 0.1218  | 0.1080  | 0.1032  | 0.0786 | 0.0682  | 0.0367  | 0.0099  | 0.0367  | 0.0099  | 0.0367  | 0.0099  | 0.0367  | 0.0099  | 0.0367  | 0.0099  | 0.0367  | 0.0099  | 0.0367  | 0.0099  | 0.0367  | 0.0099  | 0.0367  | 0.0099  | 0.0367  | 0.0099  |        |
| VLDL Triglycerides   | 0.1368                                                       | 0.1058  | 0.1041  | 0.1062  | 0.0955  | 0.11525 | 0.0833  | 0.09126 | 0.0734 | 0.0483  | 0.03189 | 0.05903 | 0.0483  | 0.03189 | 0.05903 | 0.0483  | 0.03189 | 0.05903 | 0.0483  | 0.03189 | 0.05903 | 0.0483  | 0.03189 | 0.05903 | 0.0483  | 0.03189 | 0.05903 | 0.0483  | 0.03189 | 0.05903 |        |
| IDL Triglycerides    | 0.1589                                                       | 0.1073  | 0.1025  | 0.1142  | 0.0879  | 0.1108  | 0.0811  | 0.1137  | 0.0636 | 0.0548  | 0.0601  | 0.0294  | 0.0601  | 0.0294  | 0.0601  | 0.0294  | 0.0601  | 0.0294  | 0.0601  | 0.0294  | 0.0601  | 0.0294  | 0.0601  | 0.0294  | 0.0601  | 0.0294  | 0.0601  | 0.0294  | 0.0601  | 0.0294  |        |
| LDL Triglycerides    | 0.1471                                                       | 0.1822  | 0.1817  | 0.1523  | 0.1546  | 0.1509  | 0.1821  | 0.1510  | 0.1466 | 0.1348  | 0.0879  | -0.2041 | -0.0261 | 0.0867  | -0.1844 | 0.0218  | 0.0112  | -0.1254 | 0.0181  | 0.0352  | 0.0109  | 0.0480  | 0.0480  | 0.0480  | 0.0480  | 0.0480  | 0.0480  | 0.0480  | 0.0480  | 0.0480  |        |
| VLDL-1 Triglycerides | 0.1317                                                       | 0.1360  | 0.1433  | 0.1058  | 0.1179  | 0.1570  | 0.1615  | 0.1201  | 0.0932 | 0.1262  | 0.0620  | -0.2116 | -0.0937 | 0.0620  | -0.2116 | -0.0937 | 0.0620  | -0.2116 | -0.0937 | 0.0620  | -0.2116 | -0.0937 | 0.0620  | -0.2116 | -0.0937 | 0.0620  | -0.2116 | -0.0937 | 0.0620  | -0.2116 |        |
| VLDL-2 Triglycerides | 0.0716                                                       | 0.1393  | 0.1657  | 0.1826  | 0.1634  | 0.1555  | 0.1709  | 0.1106  | 0.1245 | 0.1489  | 0.0714  | -0.0707 | -0.0481 | 0.0714  | -0.0707 | -0.0481 | 0.0714  | -0.0707 | -0.0481 | 0.0714  | -0.0707 | -0.0481 | 0.0714  | -0.0707 | -0.0481 | 0.0714  | -0.0707 | -0.0481 | 0.0714  |         |        |
| VLDL-3 Triglycerides | 0.1141                                                       | 0.1506  | 0.1373  | 0.1468  | 0.1658  | 0.1598  | 0.1681  | 0.1643  | 0.1371 | 0.1081  | 0.0245  | -0.0562 | -0.0562 | 0.0245  | -0.0562 | -0.0562 | 0.0245  | -0.0562 | -0.0562 | 0.0245  | -0.0562 | -0.0562 | 0.0245  | -0.0562 | -0.0562 | 0.0245  | -0.0562 | -0.0562 | 0.0245  |         |        |
| VLDL-4 Triglycerides | 0.12615                                                      | 0.17961 | 0.1805  | 0.1543  | 0.1629  | 0.1518  | 0.1737  | 0.1196  | 0.1258 | 0.1381  | 0.0913  | -0.0458 | -0.0361 | 0.0913  | -0.0458 | -0.0361 | 0.0913  | -0.0458 | -0.0361 | 0.0913  | -0.0458 | -0.0361 | 0.0913  | -0.0458 | -0.0361 | 0.0913  | -0.0458 | -0.0361 | 0.0913  |         |        |
| VLDL-5 Triglycerides | 0.1285                                                       | 0.1304  | 0.1417  | 0.1378  | 0.1243  | 0.1584  | 0.1316  | 0.1175  | 0.1205 | 0.0739  | 0.0545  | 0.0289  | 0.0545  | 0.0289  | 0.0545  | 0.0289  | 0.0545  | 0.0289  | 0.0545  | 0.0289  | 0.0545  | 0.0289  | 0.0545  | 0.0289  | 0.0545  | 0.0289  | 0.0545  | 0.0289  | 0.0545  | 0.0289  |        |
| VLDL-6 Triglycerides | 0.1173                                                       | 0.1022  | 0.1104  | 0.1087  | 0.1087  | 0.1087  | 0.1087  | 0.1087  | 0.1087 | 0.1087  | 0.1087  | 0.1087  | 0.1087  | 0.1087  | 0.1087  | 0.1087  | 0.1087  | 0.1087  | 0.1087  | 0.1087  | 0.1087  | 0.1087  | 0.1087  | 0.1087  | 0.1087  | 0.1087  | 0.1087  | 0.1087  | 0.1087  | 0.1087  |        |
| HDL Triglycerides    | 0.1188                                                       | 0.0811  | 0.0871  | 0.0797  | 0.0803  | 0.1086  | 0.11629 | 0.0507  | 0.0711 | 0.0211  | -0.0440 | -0.0755 | -0.0440 | -0.0755 | -0.0440 | -0.0755 | -0.0440 |         |         |         |         |         |         |         |         |         |         |         |         |         |        |

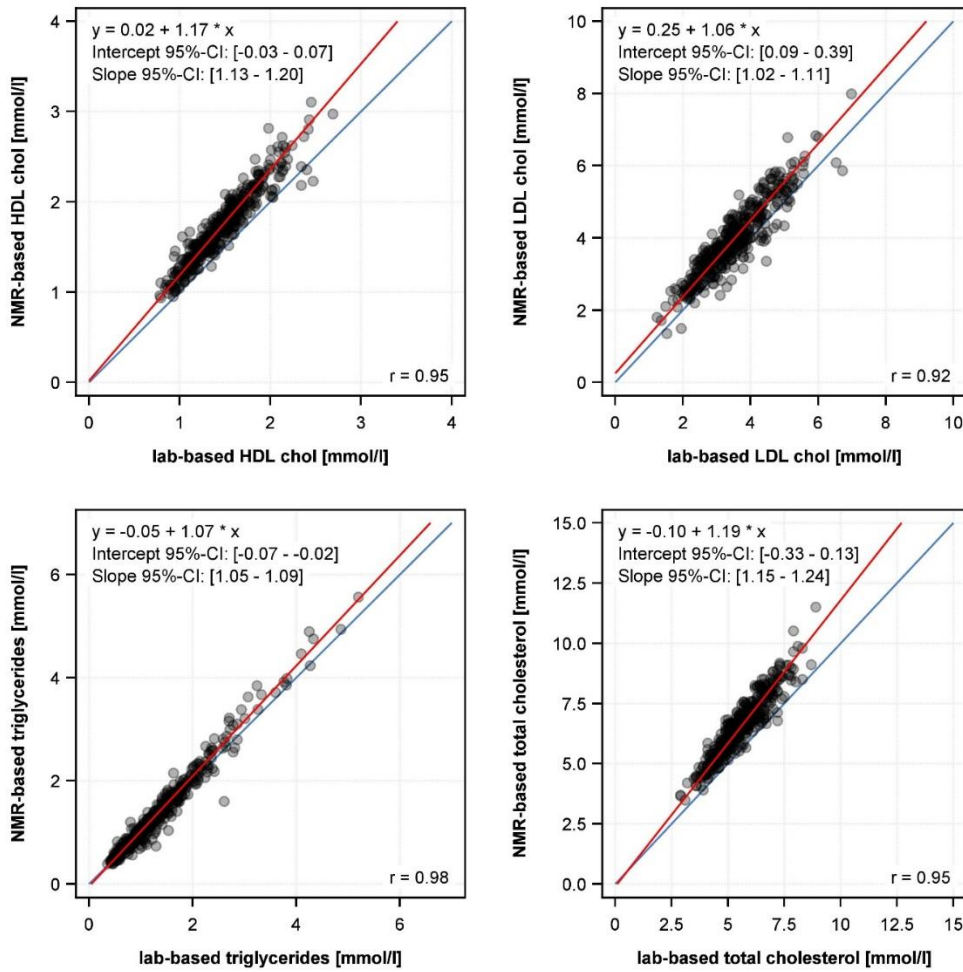

**Figure S1.** Comparison of the lipid levels measured by NMR spectroscopy and standard laboratory measurements. Passing-Bablok regression plots are displayed: the solid red line represents the regression line, the blue line represents the diagonal. Slope and intercept are given with the 95% confidence interval (CI). Pearson correlation coefficients are given (bottom right).

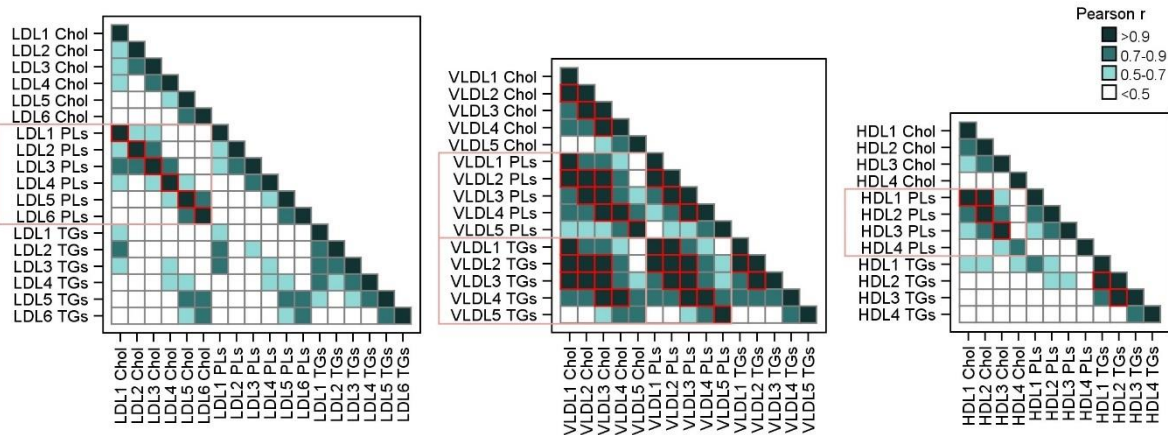

**Figure S2.** Correlation matrices showing within-particle Pearson correlations of cholesterol, phospholipid and triglyceride content in LDL subclasses (left), VLDL subclasses (middle) and HDL subclasses (right).

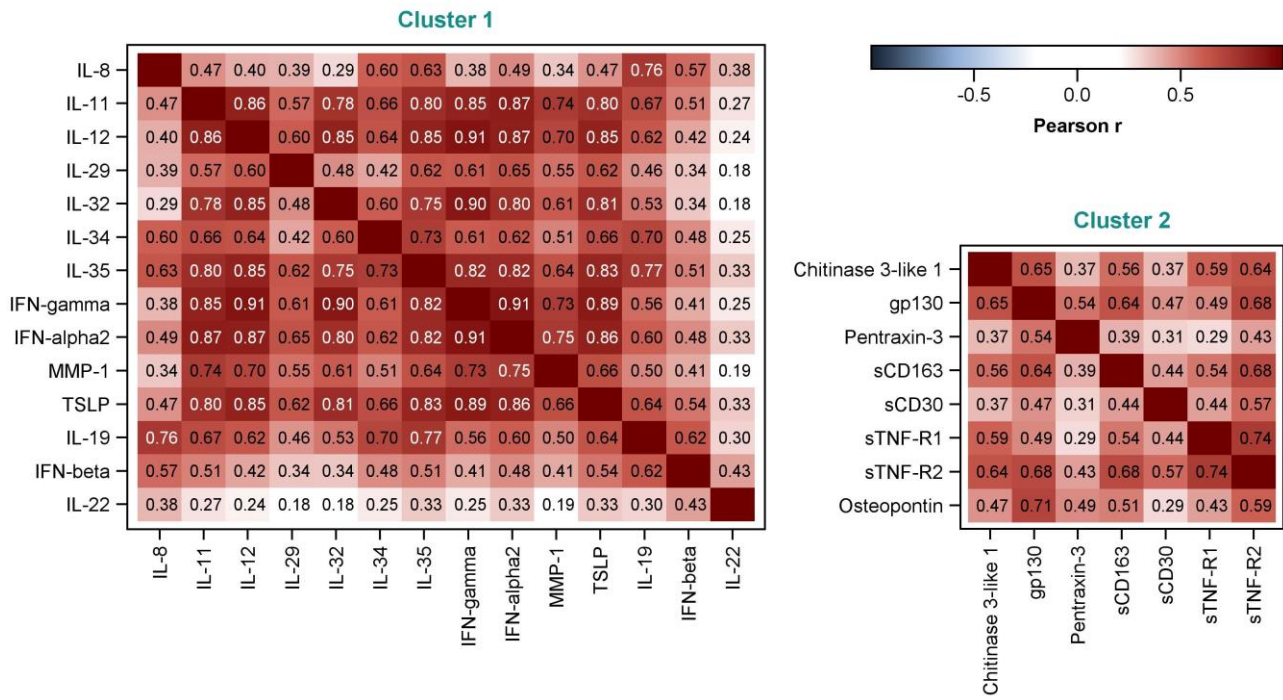

**Figure S3.** Color-coded Pearson correlation coefficients for the identified clusters of inflammatory markers. For all displayed correlations the p-values was < 0.01.

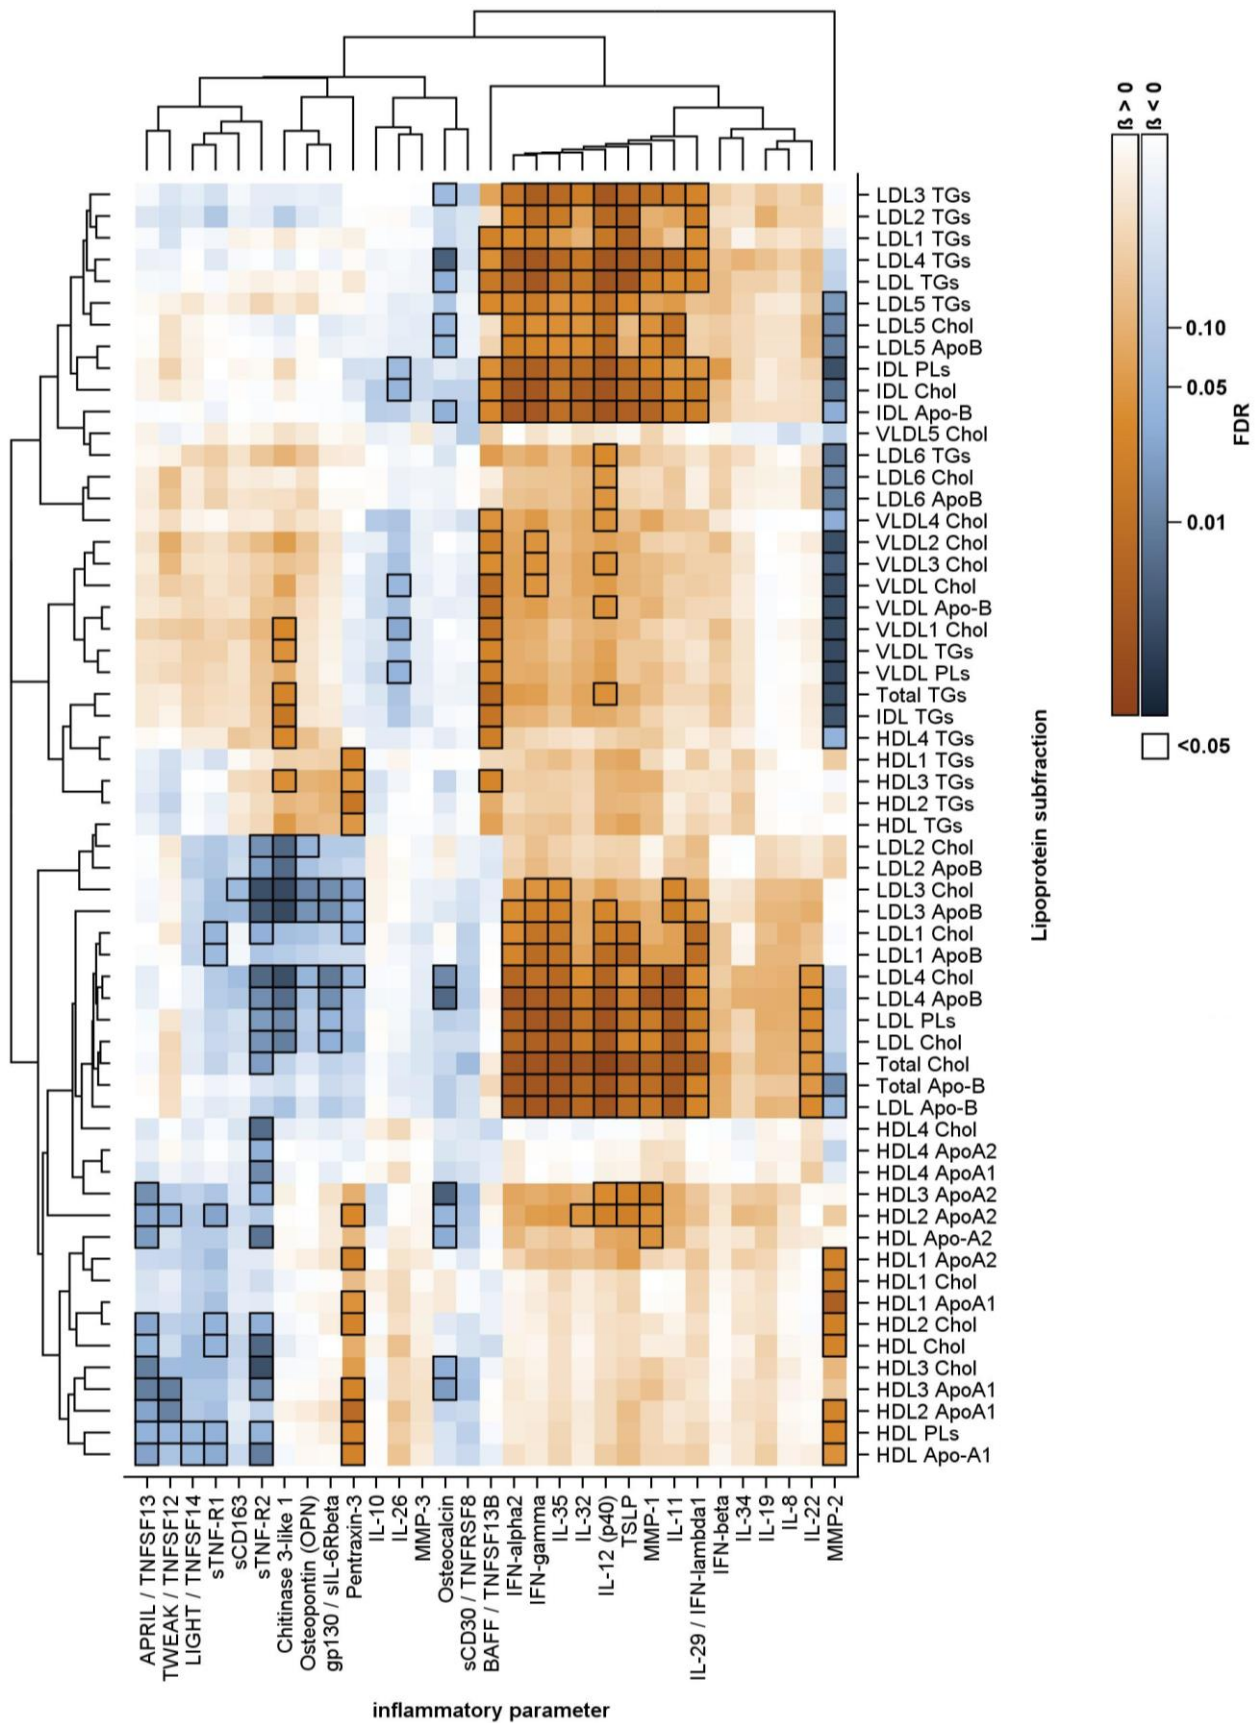

**Figure S4.** Color coded corrected P values (controlling the false discovery rate (FDR) at 0.05) from linear regression analyses for all investigated associations of lipoprotein subclasses with inflammatory parameters. Significant associations (FDR < 0.05) are marked with a black box. All analyses were adjusted for age, sex, smoking behavior and lean body mass. Orange and blue shading indicate positive and inverse associations, respectively.

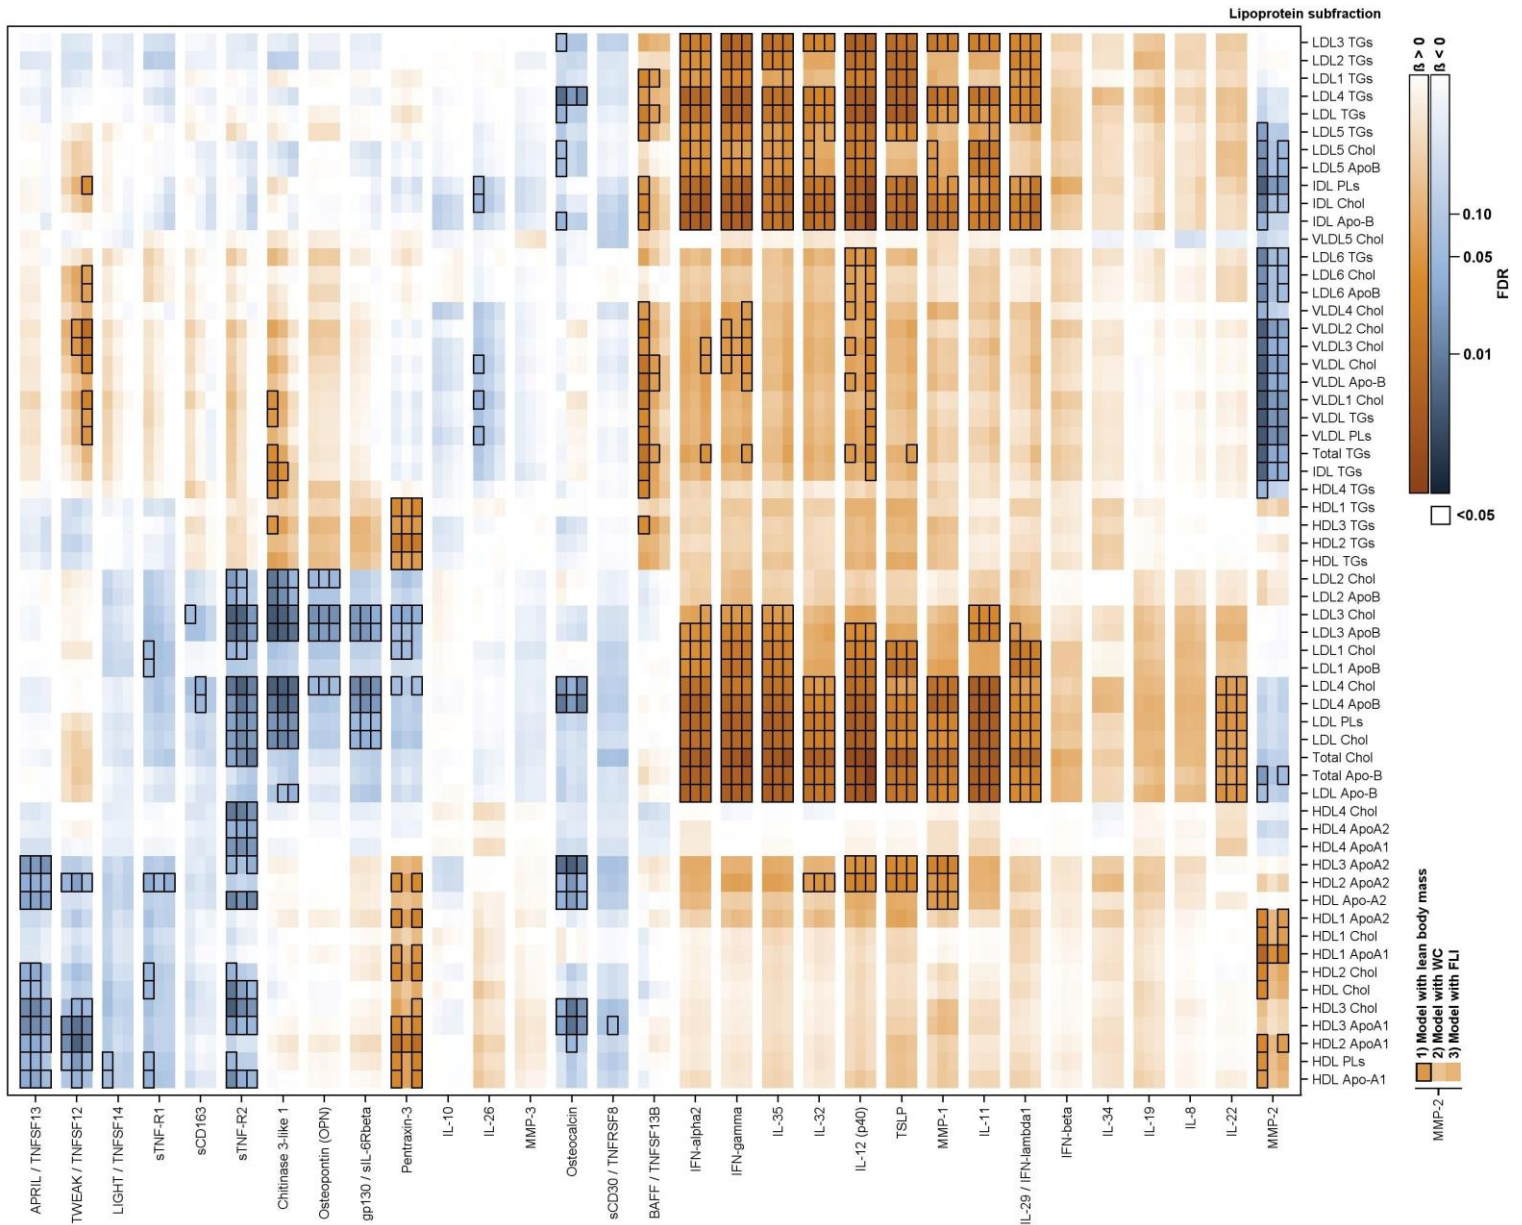

**Figure S5.** Color coded corrected P values (controlling the false discovery rate (FDR) at 0.05) from linear regression analyses for all investigated associations of lipoprotein subclasses with inflammatory parameters. Significant associations (FDR < 0.05) are marked with a black box. Orange and blue shading indicate positive and inverse associations, respectively. Three different models were calculated: Model 1) adjusted for age, sex, smoking behavior and lean body mass. Model 2) adjusted for age, sex, smoking behavior and waist circumference (WC). Model 3) adjusted for age, sex, smoking behavior and fatty liver index (FLI).
